1 Title: A pilot study of behavioral, environmental, and occupational risk factors for chronic  
2 kidney disease of unknown etiology in Sri Lanka

3

4 Short Title: Chronic kidney disease of unknown etiology (CKDu) case-control study in Sri  
5 Lanka

6

7 Jake M. Pry<sup>1,2</sup>; Wendi Jackson<sup>3</sup>; Ruwini Rupasinghe<sup>3,4</sup>; Guneratne Lishanthe<sup>5</sup>; Zied Badurdeen<sup>6</sup>,  
8 Tilak Abeysekara<sup>6</sup>; Rohana Chandrajith<sup>7</sup>; Woutrina Smith<sup>3</sup>, Saumya Wickramasinghe<sup>4</sup>

9

10 <sup>1</sup>Centre for Infectious Disease Research Zambia, Lusaka, Zambia

11 <sup>2</sup>School of Medicine, Washington University, St. Louis, MO, U.S.A.

12 <sup>3</sup>School of Veterinary Medicine, University of California, Davis, U.S.A

13 <sup>4</sup>Faculty of Veterinary Medicine and Animal Science, University of Peradeniya, Sri Lanka

14 <sup>5</sup>Renal Research Centre, District Hospital, Girandurukotte, Sri Lanka

15 <sup>6</sup>Faculty of Medicine, University of Peradeniya, Sri Lanka

16 <sup>7</sup>Faculty of Science, University of Peradeniya, Sri Lanka

17

18 Corresponding author: [jpry@wustl.edu](mailto:jpry@wustl.edu)

19 Jake Michael Pry

20 Department of Infectious Disease

21 Washington University

22 660 S. Euclid Ave. St. Louis, MO 63110

23 Mobile. +260 96 3088750 | +1 936-661-6885

24 **ABSTRACT**

25 Chronic kidney disease of unknown etiology (CKDu) was first recognized in Sri Lanka in the early  
26 1990s, and since then it has reached epidemic levels in the North Central Province of the country.  
27 The prevalence of CKDu is reportedly highest among communities that engage in chena and paddy  
28 farming, which is most often practiced in the dry zone including the North Central and East Central  
29 Provinces of Sri Lanka. Previous studies have suggested varied hypotheses for the etiology of  
30 CKDu; however, there is not yet a consensus on the primary risk factors, possibly due to disparate  
31 study designs, sample populations, and methodologies. The goal of this pilot case-control study  
32 was to evaluate the relationships between key demographic, cultural, and occupational variables  
33 as risk factors for CKDu, with a primary interest in pesticide exposure both occupationally and  
34 through its potential use as an ingredient in brewed kasippu alcohol. A total of 56 CKDu cases  
35 and 54 control individuals were surveyed using a proctored, self-reported questionnaire.  
36 Occupational pesticide exposure and alcohol consumption were not found to be significant risk  
37 factors for CKDu. However, a statistically significant association with CKDu was observed with  
38 chewing betel (OR: 6.11, 95% CI: 1.93, 19.35), age (OR: 1.07, 95% CI: 1.02, 1.13), owning a pet  
39 dog (OR: 3.74, 95% CI: 1.38, 10.11), water treatment (OR: 3.68, 95% CI: 1.09, 12.43) and pests  
40 in the house (OR: 5.81, 95% CI: 1.56, 21.60). The findings of this study suggest future research  
41 should focus on practices associated with chewing betel, potential animal interactions including  
42 pests in the home and pets, and risk factors associated with water.

43

44 **AUTHOR SUMMARY**

45 Since a new variant of chronic kidney disease was acknowledged in the early 1990s among those  
46 in the agricultural community of Sri Lanka, especially rice farmers, the research community has

47 searched for causes of what has become known as chronic kidney disease of unknown etiology or  
48 CKDu. Previous studies have focused on heavy metals in the environment as they are known to be  
49 toxic to the kidneys however, a proverbial “smoking gun” has yet to be identified. Understanding  
50 that the causes is potential multifactorial we implemented a pilot case-control study using a One  
51 Health methodology administering a comprehensive interview to assess environmental, animal,  
52 and, human exposures that may be contributing to the diagnosis of CKDu. We found statistically  
53 significant odds ratio among those that reported having a pet dog, chewing betel (a traditional  
54 preparation or various ingredients wrapped in a betel leaf inserted between the teeth and cheek),  
55 pests in the home, treating drinking water, and older age. These results serve to guide further  
56 hypothesis generation regarding mechanisms behind associated exposures from infectious diseases  
57 such as hantavirus and leptospirosis to food preparation through boiling drinking water in  
58 aluminum vessels and oral pesticide exposure linked to betel preparation.

59

## 60 **INTRODUCTION**

61       There has been a notable increase in the recognized incidence of chronic kidney disease  
62 (CKD) around the world [1]. Kidney disease has moved from 27<sup>th</sup> most common cause of death in  
63 1990, to 18<sup>th</sup> in 2010 and has come to be considered a global public health problem causing high  
64 morbidity, mortality, and financial burden [2-4]. Global prevalence of CKD is estimated to range  
65 between 8% and 16%, and differs substantially across developed and developing countries [3, 5].  
66 Although diabetes mellitus and hypertension remain the leading causes of CKD, in recent years a  
67 different form of CKD has reached epidemic levels, devastating rural communities in the dry zone  
68 of Sri Lanka [6, 7]. The recognition of endemic CKD in the dry zone in the 1990s coincided with  
69 the development of the rural healthcare system, which improved access to clinics by affected

70 individuals. Since that time, the dry zone has seen a disproportionate increase in cases of CKD  
71 compared to the rest of the country [8]. Existing studies describe the majority of these CKD  
72 patients as not having hypertension or diabetes mellitus, two of the major risk factors for CKD. It  
73 has therefore, been defined as a distinct condition: CKD of unknown or uncertain etiology  
74 (CKDu). Similar chronic kidney disease hotspots have been recognized among farmers in Central  
75 America (Nicaragua and El Salvador) and South Asia [9, 10].

76         Approximately 2.5 million people live in the subset of Sri Lankan provinces where CKDu  
77 is most common [11, 12]. Cases of this disease predominate in the Medawachchiya, Wilgamuwa,  
78 Nikawewa, and Girandurukotte regions of the dry zone. Studies have shown the highest prevalence  
79 of CKDu among 30-60 year old men engaged in chena or rice farming, and estimate a total of  
80 20,000 (approximately 0.8% population) affected in the North Central Province [8, 13].

81         The epidemic of CKDu in the dry zone is burdening the rural healthcare system and  
82 impacting agricultural productivity due to a reduction in the available labor force when CKDu  
83 patients are too ill to work [14-16]. Due to the irreversible and progressive nature of CKD, most  
84 patients require long-term dialysis since renal transplants are not commonly available. For these  
85 reasons, there is a need to determine the risk factors associated with CKDu to control and attenuate  
86 the incidence of new CKDu cases. A growing body of evidence suggests that CKDu is multi-  
87 factorial, making it difficult to identify individual risk factors and potential interactions involved  
88 in pathogenesis [7, 12, 17-20]. Recently, various heavy metal agents such as cadmium, arsenic  
89 agrochemicals, aluminum, and fluoride, as well as infectious diseases such as leptospirosis have  
90 been considered for association with CKDu [21-26].

91         Collaboration between researchers at the University of Peradeniya in Sri Lanka, the  
92 University of California, Davis (UCD) in the United States, and Sri Lankan stakeholders in CKDu-

93 endemic areas were involved in this pilot study. The driving hypothesis for this study is that alcohol  
94 consumption and/or pesticide exposure are associated with CKDu as a health outcome. In addition,  
95 it is recognized that relationships between key demographic, cultural, and occupational variables  
96 may play a role in CKDu health outcomes [27-31].

97

## 98 **MATERIALS AND METHODS**

99 A pilot case-control study was conducted in Sri Lanka from July-October 2015. The study  
100 population was comprised of individuals (cases and controls) who resided in the North Central  
101 Province (NCP) or Uva Province (UP) and sought medical care at Girandurukotte district hospital  
102 (UP) or Medawachchiya clinic (NCP). The population in both the NCP and UP is approximately  
103 1.2 million, with women making up the slight majority (51%) [13]. The majority of people in both  
104 provinces are Sinhalese-speaking and resides in the rural sector where they engage in farming  
105 (chena, rice). The NCP has the highest recorded prevalence of CKDu cases in Sri Lanka and is  
106 located in the country's dry zone. Uva Province is in the intermediate zone adjacent to the dry  
107 zone, with a lower prevalence of CKDu cases compared to the NCP.

108 In order to test the hypothesis that there is a relationship between alcohol consumption and  
109 CKDu diagnosis, and pesticide exposure and CKDu, in endemic areas of Sri Lanka, a questionnaire  
110 survey was developed [See Additional File 1]. The survey tool encompassed a wide range of  
111 exposures to capture potential unknown confounders, including exposures suggested by local  
112 CKDu working groups at the University of Peradeniya. Individuals meeting the CKDu case  
113 definitions as well as a comparison (control) population from the same endemic region were  
114 invited for participation in the survey.

### 115 **Case Definition**

116 Individuals diagnosed with definite or probable CKDu by a nephrologist at the  
117 Girandurukotte regional hospital (GRH) or Medawachchiya renal clinic (MRC) made up the  
118 population from which study cases were selected. An individual was considered a definite CKDu  
119 case if creatinine levels were elevated and in subsequent renal biopsy the finding was predominant  
120 tubular interstitial nephritis. A probable CKDu case was defined as persistent renal dysfunction  
121 for more than 3 months after excluding known causes including hypertension, diabetes mellitus,  
122 any other known renal diseases. This methodology is consistent with clinic/hospital programs and  
123 represents the CKDu process of diagnosis in the region. Controls were chosen based on negative  
124 results for CKDu from population screening records at GRH or MRC.

### 125 **Recruitment**

126 All controls were recruited using CKDu screening results within the past three years. These  
127 CKDu negative were invited via post (hard copy letter) to return to the healthcare facility  
128 associated with the previous screening to take part in a survey. Participation in the survey was  
129 optional. All cases were recruited from Girandurukotte regional hospital or Medawachchiya renal  
130 clinic.

### 131 **Sample Size Calculation**

132 The total sample size calculated for this pilot case-control study was 110, comprising 1:1  
133 cases to controls. The target sample size of 110 individuals was calculated based on a power of  
134 80% ( $\beta= 0.2$ ), 95% confidence ( $\alpha= 0.05$ ), and a minimum effect size of 3.0. This relatively large  
135 effect size was considered in the exploratory study in order to identify preliminary exposures  
136 strongly associated with the outcome. An estimate of 26% was used for any reported alcohol  
137 consumption among controls for the sample size calculation [32, 33].

### 138 **Survey Design**

139 Survey questions were designed by the research team in consultation with the resource  
140 personnel at the Centre for Research, Education, and Training on Kidney Diseases (CERTkID) in  
141 Sri Lanka prior to IRB approval, survey training, and interviews. The survey consisted of 138  
142 questions structured as binary, categorical, ordinal, and open-ended across six categories: 1)  
143 agricultural information; 2) animal exposure; 3) water and nutrition; 4) alcohol consumption; 5)  
144 respondent demographics; and 6) family and past medical history.

145 The agricultural information section included questions related to farming practices and  
146 agrochemical usage. Information on ownership and health of livestock and pets, presence of pest  
147 animals and wild life were collected in section two of the survey. In the water and nutrition  
148 information section, sources for drinking, cooking, and bathing water were assessed, along with  
149 participant practices regarding water treatment prior to use. The alcohol consumption information  
150 section contained questions on type of alcohol consumed, betel chewing and smoking status.  
151 Alcohol consumption was assessed in two ways: a binary question was asked first on whether the  
152 participant had ever consumed alcohol (if yes, what type and frequency) and second, whether the  
153 participant believed that alcohol was a problem in their village. The respondent demographics  
154 section contained questions pertaining to level of education and family income. To assess a  
155 potential genetic component of CKDu, participants were asked whether their spouses were close  
156 blood relatives and family history of CKDu, hypertension, and diabetes mellitus was also recorded.  
157 Detailed survey and explanation of survey components are given in Supplementary information.

158 Survey data were collected by 12 trained graduate students associated with the University  
159 of Peradeniya. In addition, investigators were present at each site during data collection, allowing  
160 surveyors the opportunity for clarification as needed in real-time as interviews were conducted.  
161 Cases and controls participated voluntarily, and surveys were administered verbally in the mother

162 tongue of the participants (Sinhala) after obtaining consent (see Supplementary Information for  
163 the English version of the consent form and survey questions). Survey question responses were  
164 recorded on paper copies of the questionnaire by the surveyor. Each interview took approximately  
165 one hour to complete.

166 The research protocol was designed according to the guidelines of the International  
167 Compilation of Human Research Standards (2015 edition) and approved by the University of  
168 California, Davis Institutional Review Board (#762486-2). Written consent of all study  
169 participants was obtained by signature or thumbprint after survey enumerators verbally read the  
170 consent statement in the appropriate language. The consent form was translated in both Sinhala  
171 and Tamil. The majority of survey interviews took place at medical clinics specializing in renal  
172 disease.

### 173 **Statistical Analyses**

174 Logistic regression was used to evaluate risk factors for CKDu case status. Bivariate  
175 analysis was used to identify covariate with  $p\text{-value} \leq 0.20$  which was used to restrict consideration  
176 for the final model. Pearson's correlation coefficient was used to identify covariate correlation at -  
177  $0.5 \leq \rho \leq 0.5$ . Data analysis was completed using Stata IC 14 (StataCorp. 2015. Stata Statistical  
178 Software: Release 14. College Station, TX: StataCorp LP). Age was evaluated as a continuous  
179 predictor and others were assessed as binary or categorical. Multiple logistic regression analyses  
180 were performed using backwards stepwise selection to model the risk factors associated with the  
181 CKDu disease outcome of interest. Adjusted analysis was done to control for possible confounding  
182 by measured covariates. Statistical significance was assessed at the  $\alpha = 0.05$ . Any observations  
183 missing data were restricted from the analysis dataset. All geospatial illustrations were prepared  
184 using QGIS v2.18 (Free Software Foundation Inc., Boston MA, USA) with administrative



185 boundaries provided by GADM v2.8 (Center for Spatial Statistic, University of California Davis,  
186 USA, accessed November 2015).

187

## 188 **RESULTS**

189 A total of 110 participants were included in the analysis; 56 met the case definition and 54  
190 satisfied control criteria (Table S1). All participants resided in the CKDu endemic regions in  
191 Girandurukotte and Medawachchiya districts in Sri Lanka at the time of diagnosis. No missing  
192 data was identified in the analysis dataset. Participants had a mean age of 52.6 years (range = 25-  
193 80); there was a slight majority of males (60%) to females (40%). Most participants reported to be  
194 married, with about half reporting being married to a spouse that was a close blood relative and  
195 slightly over half reporting a family member having been diagnosed with CKDu (Table S1). Of  
196 the 110 study participants, half reported consuming any type of alcohol and the majority reported  
197 using some type of pesticide in their daily lives (insecticide, herbicide, in-home pesticide and/or  
198 fungicide) (Table S1).

199 The majority of participants (74) were residing in the Uva Province. Twenty-two  
200 participants resided in the North Central Province, five in the Eastern Province, two in the Central  
201 Province and one resided in the Northwestern Province. There were 8 (7.3%) individuals for whom  
202 reliable current residence information was not available due to survey legibility and  
203 standardization complications. Data regarding province in which the participant was born were  
204 collected (Fig 1). No participants reported birth outside of Sri Lanka.

205

206 **Figure 1. Map of Sri Lanka by district indicating participant's birth district**

207 After bivariate and correlational analyses, smoking unfiltered cigarettes and smoking  
 208 cannabis were found to be highly correlated (correlation coefficient = 0.5141 > 0.5 threshold).  
 209 Smoking unfiltered cigarettes was dropped from model consideration given a bivariate p-value  
 210 higher than that of smoking cannabis (p-value = 0.186 and 0.112, respectively).

211 Sources of drinking water were surveyed and ‘dug well’ was the most common source  
 212 (90.9%) of drinking/cooking water, with ‘rainwater collection containers’ being the second most  
 213 common source. Drinking water was reported to be treated with routine methods such as boiling  
 214 or filtering, or traditional methods such as placing igini (*strychnos potatorum*) seeds in the water  
 215 source/well [34]. A subset of key population characteristics is reported in Table 1.

216 **Table 1: Study Population Characteristics by Case-Control Status**

| <i>Factor</i>                | <i>Level</i>     | <i>Control</i> | <i>Case</i> | <i>p-value</i> |
|------------------------------|------------------|----------------|-------------|----------------|
| <i>N</i>                     |                  | 54             | 56          |                |
| Age, mean (SD)*              |                  | 49.5 (11.7)    | 57.5 (9.6)  | <0.001         |
| Gender*                      | Female           | 27 (51)        | 16 (29)     | 0.017          |
|                              | Male             | 26 (49)        | 40 (71)     |                |
| Farming as Occupation*       | No               | 14 (28)        | 3 (6)       | 0.002          |
|                              | Yes              | 36 (72)        | 51 (94)     |                |
| Drinking Water Source        | Dug Well         | 48 (89)        | 52 (93)     | 0.47           |
|                              | Rain Water       | 6 (11)         | 5 (9)       | 0.7            |
| Treat Drinking Water         | Drinking         | 34 (63)        | 41 (75)     | 0.19           |
| Keep Livestock               | Livestock        | 17 (31)        | 19 (34)     | 0.78           |
| Smoking Status               | Tobacco          | 8 (15)         | 14 (25)     | 0.18           |
|                              | Cannabis         | 2 (4)          | 7 (12)      | 0.092          |
| Chew Betel*                  | Betel            | 22 (41)        | 40 (71)     | 0.001          |
| Alcohol a Problem in Village | Not a Problem    | 13 (27)        | 11 (21)     | 0.85           |
|                              | Minor Problem    | 17 (35)        | 20 (38)     |                |
|                              | Moderate Problem | 10 (20)        | 9 (17)      |                |
|                              | Major Problem    | 9 (18)         | 12 (23)     |                |
| Alcohol Consumption          | Any Alcohol      | 22 (41)        | 33 (59)     | 0.056          |

|                |             |         |         |       |
|----------------|-------------|---------|---------|-------|
|                | Arrack      | 19 (35) | 27 (48) | 0.17  |
|                | Beer        | 14 (26) | 16 (29) | 0.76  |
|                | Kasippu     | 13 (24) | 18 (32) | 0.35  |
| Pesticide Use* | Any         | 42 (78) | 52 (93) | 0.025 |
|                | Fungicide   | 21 (44) | 29 (55) | 0.27  |
|                | Herbicide   | 41 (76) | 51 (91) | 0.032 |
|                | Insecticide | 42 (78) | 44 (79) | 0.92  |

217 \*Significance attributed as p-value < 0.05

218 There is a significant difference between age, gender, occupation, chewing betel, pesticide  
 219 use at the 95% confidence level. The cases were older, on average, by eight years than the control  
 220 group with a gender imbalance finding males more often among the cases compared to controls.  
 221 Cases cited farming as an occupation more often than controls (22% higher among cases), reported  
 222 chewing betel (30% higher among cases), and used pesticides more often, specifically herbicide,  
 223 (15% higher among cases).

224 Two multivariable models were constructed, an exposure of interest model and an  
 225 exploratory model. The exposure of interest model forced inclusion of variables concerning  
 226 alcohol consumption and pesticide exposure, as neither exposure of interest was found to be  
 227 significantly associated with CKDu in bivariate analysis (Table 2). The final exposure of interest  
 228 model included four variables and excluded one variable compared to the stepwise method used  
 229 for the exploratory model (Table 3). The exploratory model (Table 3) included only risk factors  
 230 significantly associated with CKDu status ( $P < 0.05$ ). The primary exposures of interest (alcohol  
 231 consumption and pesticide exposure) were not found to be significant using a backward stepwise  
 232 selection process. However, age – considered as a continuous variable (OR: 1.08, 95% CI 1.02,  
 233 1.13), chewing betel (OR 4.01, 95% CI 1.49, 10.81), keeping a pet dog (OR: 4.21, 95% CI 1.55,  
 234 11.48), and reporting pests in the home (OR: 3.96, 95% CI 1.21, 12.93) were significantly  
 235 associated with CKDu case status.

236 **Table 2. Factors Associated with CKDu including Pesticide and Alcohol Consumption in**  
 237 **Sri Lanka**  
 238

| <b>Factor</b>     | <b>Odds Ratio</b> | <b>P-Value</b> | <b>95% Confidence Interval</b> |       |
|-------------------|-------------------|----------------|--------------------------------|-------|
| Age*              | 1.12              | <0.01          | 1.04                           | 1.21  |
| Sex: Male         | 6.19              | 0.07           | 0.73                           | 44.06 |
| Chew betel        | 3.57              | 0.08           | 0.86                           | 14.84 |
| Pet dog*          | 4.41              | 0.03           | 1.19                           | 16.27 |
| Pests in-home*    | 8.19              | 0.02           | 1.45                           | 46.18 |
| Consume Arrack    | 0.64              | 0.62           | 0.11                           | 3.86  |
| Consume Beer      | 1.15              | 0.88           | 0.18                           | 7.34  |
| Consume Kasippu   | 0.26              | 0.23           | 0.03                           | 2.39  |
| Fungicide         | 1.45              | 0.57           | 0.41                           | 5.17  |
| Herbicide         | 1.00              | 1.00           | -                              | -     |
| In-home pesticide | 0.82              | 0.79           | 0.34                           | 4.97  |
| Insecticide       | 1.00              | 1.00           | -                              | -     |

239 Note: Exposures of interest kept in model despite non-significant p-value  
 240 \*Significance attributed as p-value < 0.05

241  
 242 **Table 3. Factors Associated with CKDu in Sri Lanka**

| <b>Factor</b>  | <b>Odds Ratio</b> | <b>P-Value</b> | <b>95% Confidence Interval</b> |        |
|----------------|-------------------|----------------|--------------------------------|--------|
| Chew betel*    | 5.95              | 0.002          | 1.878                          | 18.856 |
| Pet dog*       | 3.515             | 0.012          | 1.312                          | 9.42   |
| Treat water*   | 3.944             | 0.026          | 1.175                          | 13.236 |
| Pests in-home* | 5.708             | 0.009          | 1.538                          | 21.182 |
| Age*†          | 1.078             | 0.003          | 1.025                          | 1.133  |

\*Significance attributed as p-value < 0.05; † Odds ratio per one year age increase

243 Bivariate analyses for specific types of pesticides and fertilizers used are detailed in Table  
 244 4. Before adjustment for age, gender, occupation, and alcohol consumption, usage of a fertilizer  
 245 (muriate of potash) and an herbicide (glyphosate) were significantly associated with confirmed  
 246 CKDu cases. However, after adjustment, none of the fertilizers, insecticides, or herbicides reported  
 247 were found to be significantly associated with the outcome of interest, and so were not included in  
 248 multivariable models (Table 4).

249 **Table 4.** Agrochemical Association with CKDu - Crude and Adjusted Odds Ratios

| <b>Factor</b>          | <b>Control<br/>(N=54)<br/>n(%)</b> | <b>Case<br/>(N=56)<br/>n(%)</b> | <b>Crude Odds<br/>Ratio (95% CI)</b> | <b>Adjusted Odds<br/>Ratio (95% CI)</b> |
|------------------------|------------------------------------|---------------------------------|--------------------------------------|-----------------------------------------|
| <b>Fertilizer</b>      |                                    |                                 |                                      |                                         |
| Urea                   | 38 (70%)                           | 47 (84%)                        | 2.20 (0.9, 5.5)                      | 0.92 (0.3, 3.2)                         |
| Muriate of Potash*     | 1 (2%)                             | 0 (0%)                          | 3.15 (1.4, 7.4)                      | 1.86 (0.7, 5.1)                         |
| Triple Super Phosphate | 11 (20%)                           | 21 (38%)                        | 2.35 (1.0, 5.5)                      | 1.84 (0.7, 5.2)                         |
| Mud/Manure             | 11 (20%)                           | 5 (9%)                          | 0.38 (0.1, 1.2)                      | 0.41 (0.1, 1.5)                         |
| <b>Insecticide</b>     |                                    |                                 |                                      |                                         |
| Carbosulfan            | 5 (9%)                             | 3 (5%)                          | 0.55 (0.13, 2.44)                    | 0.48 (0.1, 2.5)                         |
| Carbofuran             | 4 (7%)                             | 4 (7%)                          | 0.96 (0.23, 4.06)                    | 0.47 (0.1, 2.4)                         |
| Curateer               | 7 (13%)                            | 6 (11%)                         | 0.81 (0.25, 2.57)                    | 0.74 (0.2, 2.8)                         |
| <b>Herbicide</b>       |                                    |                                 |                                      |                                         |
| Glyphosate*            | 19 (35%)                           | 32 (57%)                        | 2.46 (1.14, 5.30)                    | 1.09 (0.4, 2.8)                         |
| MCPA                   | 24 (44%)                           | 28 (50%)                        | 1.25 (0.59, 2.65)                    | 0.92 (0.4, 2.3)                         |
| DPA                    | 11 (20%)                           | 17 (30%)                        | 1.70 (0.71, 4.08)                    | 0.88 (0.3, 2.5)                         |

|           |         |         |                   |                 |
|-----------|---------|---------|-------------------|-----------------|
| Metamifop | 8 (15%) | 8 (14%) | 0.96 (0.33, 2.77) | 1.39 (0.4, 4.9) |
|-----------|---------|---------|-------------------|-----------------|

250 \*  $p \leq 0.05$ ; Adjusted by age, gender, farming occupation and alcohol consumption

251 **Figure 2: Proportional Venn Diagrams Representing Reported Alcohol Type Consumed by**  
252 **Case-Control Status**

253 Figure 2 illustrates the difference between cases and control by type of alcohol reportedly  
254 consumed. Cases were more likely to report drinking. The overlap between all three types of  
255 alcohol indicates that if one consumes alcohol it is common to drink all three types surveyed.  
256 Arrack was the most commonly reported alcohol consumed across cases and controls. Overall  
257 reported alcohol consumption was observed among 2.3% of women, while 81.8% of men  
258 reported drinking alcohol (two-sided Fisher's exact:  $<0.001$ ).

259 **DISCUSSION**

260 There was no significant association detected between CKDu and pesticide exposure nor  
261 alcohol consumption. However, there were significant associations identified for chewing betel,  
262 owning a pet dog, treatment of drinking water, reporting pests in the home, and age. These  
263 significant exposures provide insight into previously unconsidered routes and mechanism for  
264 CKDu in addition to potential guidance on how to reduce odds of CKDu diagnosis. Chewing betel  
265 could be a risk directly or indirectly through contamination of the traditional chew ingredients or  
266 through handling and/or preparation of the betel chew. The association between report of a pet dog  
267 could suggest a zoonotic pathway and pests in the home could indicate pest extermination agent  
268 risks or a disease reservoir. Treatment of drinking water, especially boiling, may contribute to  
269 consumption of aluminum with nephrotoxic consequences. The wide variety of associated  
270 exposures suggests that there may be multiple risk factors associated with CKDu, which is  
271 consistent with results of previous studies [35, 36].

272           It is important to note that those cases reporting ever having been diagnosed with diabetes  
273 or hypertension were diagnosed after meeting the CKDu case definition. Prevalence of diabetes  
274 among controls was high (24.1%) relative to the 2011 and 2030 national estimates of 7.8% and  
275 9.1%, respectively [37]. The questionnaire did not differentiate between type I or type II diabetes  
276 mellitus, limiting inferences about reasons for this discrepancy in prevalence. It is possible that  
277 changes in meal preparation (bivariate OR = 1.60 95% CI 0.74-3.44) and/or food stuffs available  
278 in rural Sri Lanka also play a role in the increased prevalence of diabetes in this control sample.  
279 Conversely, diagnosis of hypertension is significantly higher (Fisher's exact = 0.002) among the  
280 cases. However, this is common sequelae of chronic kidney disease [38-40].

281           Uses of a variety of agrochemicals are common throughout the farming dry zone regions  
282 and are often readily available through government subsidies. In our study, only herbicide use was  
283 shown to be significant in the bivariate analysis among all insecticide, fungicide, and in-home  
284 pesticide parameters. It is possible that exposure to pesticide occurs among those farmers reporting  
285 no use of pesticides on their crops through adjacent farm pesticide use in tandem with dynamic  
286 environmental factors, i.e. flooding, water source contamination, and winds.

287           The ingredients used in making kasippu, an illicit locally brewed alcohol, were of special  
288 interest in this study, due to prior hypothesis that pesticides are introduced in the brewing process.  
289 However, study participants who reported drinking kasippu most often purchased it from other  
290 villagers and either did not know the ingredients used or did not want to report drinking kasippu  
291 due to it being an illicit form of alcohol in Sri Lanka as well as the perceived cultural stigma for  
292 reporting use. Of those that did report drinking kasippu, some reported urea as an ingredient in  
293 kasippu production, which could have potentially toxic biologic effects, leading to increased blood  
294 urea nitrogen subsequently impacting kidney function [41, 42].

295 Previous studies have suggested that drinking water quality and contamination may be  
296 associated with CKDu [43-45]. Prior studies have identified cases and controls on the basis of  
297 groundwater source and found much larger odds of disease in males who drank water from shallow  
298 wells, compared to males who drank from natural springs (OR 5.48 95% CI 3.46-8.66) [46, 47].  
299 Similar findings were found for women drinking from shallow wells (OR 4.40 95% CI 2.23-8.68)  
300 [46]. Due to the broad application of pesticides in all aspects of farming, potentially nephrotoxic  
301 pesticide agents contaminating the drinking water cannot be ruled out. Our findings differ  
302 somewhat from these prior studies in the minor difference between 89% (controls) and 93% (cases)  
303 reported source of drinking water as a dug well. We however, were not able to compare other  
304 sources of drinking water with high confidence and statistical power.

305 Dug wells are traditional wells often lined with clay brick and may be covered to prevent  
306 animals from entering. There were few participants who received water via a tap line, rainwater  
307 collectors, or methods other than a dug well. As such, our ability to evaluate drinking water source  
308 as a risk factor was limited. In addition, the number of years that participants used different types  
309 of drinking water was inconsistently recorded. Treatment of drinking water was found to be a  
310 significant risk factor for CKDu. Treatment of water included boiling water (n=41), filtering water  
311 (n=59), and traditional methods (n=19). The most common traditional practice for water treatment  
312 was the introduction of *Strychnos potatorum* seeds (Sinhalese - ingini seeds) into the water source,  
313 as is customary in Sri Lanka and India [48]. One possible risk for developing CKDu related to  
314 treating drinking water could be the boiling (n = 41) of water in aluminum vessels [49].  
315 Information regarding the type of cookware used with relation to boiling water was not collected.

316 Our study found novel risk factors for CKDu in the study region. Results regarding the  
317 potential mechanisms of association with CKDu for chewing betel, treatment of drinking water,



318 and having pets or pests are inconclusive. For instance, dogs in Sri Lanka are often community  
319 pets and as such, ownership can be difficult to ascertain, although 43% of study participants  
320 reported having a pet dog. Additionally, dogs may serve as reservoirs of infectious disease that  
321 may lead to renal damage in humans. For example, outbreaks of leptospirosis have been reported  
322 during the monsoon season in some CKDu endemic regions [50, 51]. Leptospirosis causes acute  
323 kidney failure in dogs, with high mortality rates among those that are untreated or without access  
324 to dialysis. Consequently, dogs may potentially shed *Leptospira* spirochetes in their urine. Owners  
325 or community individuals may be thus exposed, potentially clearing the infection but suffering  
326 renal damage that could later lead to developing CKDu [52]. Current Ministry of Health CKDu  
327 diagnosis criteria do not include serology or polymerase chain reaction (PCR) tests for ruling out  
328 leptospirosis; patients are asked only to self-report previous history of leptospirosis. As  
329 leptospirosis diagnostics continue to improve, future research should consider specimen collection  
330 for laboratory confirmation [53-55].

331 Mammalian pests in households may also be carriers of infectious disease that leads to  
332 increased susceptibility to CKDu. There is an emerging hypothesis that Hanta virus could be the  
333 possible causative agent for CKDu in Sri Lanka's dry zone [26, 56]. Humans infected with Hanta  
334 virus show clinical signs similar to those of Leptospirosis, and Hanta virus infection in humans  
335 was first described in Sri Lanka in the mid-eighties [57]. Rodents act as the reservoir host for Hanta  
336 virus and Leptospirosis. Therefore, our study may provide further evidence for the association  
337 between infected rodents and prevalence of CKDu in Sri Lanka. Further research should evaluate  
338 the incidence of Hanta virus and Leptospirosis in rodents, pets, livestock, and people in CKDu-  
339 endemic regions in Sri Lanka.

340 To identify other disease risks that might be due to close contact with domestic animals or  
341 wildlife, data was collected concerning participant observations of illness among domestic animals  
342 in the community. There were very few reported, including three observations of ill cattle (2.7%),  
343 one goat (0.9%), and one chicken (0.9%) in the month prior to the survey interview. It is possible  
344 that the lifespan of dogs and livestock in the community is short due to environmental hazards  
345 (disease, trauma, etc.) and animals go missing or die before disease can be detected or transmitted  
346 to humans.

347 Chewing betel was another novel risk factor for CKDu in our study. This practice is quite  
348 common among Sri Lankans, and our study found that chewing betel was more common among  
349 those reporting farming as an occupation (60%) than other occupations (40%). There is evidence  
350 that betel preparations include stimulant properties similar to nicotine, and chewing it routinely  
351 can lead to enamel erosion and oral cancer [58-60]. The betel preparation commonly chewed in  
352 Sri Lanka is comprised of betel, areca nut, tobacco, and lime. However, betel recipes among  
353 farmers in Sri Lanka's dry zone may contain differing substances compared to preparations in the  
354 remainder of the country, which could be associated with CKDu [58, 61, 62]. Individuals that mix  
355 and distribute pesticides may be at greater risk, as betel is inserted in the mouth and may be done  
356 in the field where hand washing is not possible. In addition, there is evidence that chewing betel  
357 increases exposure to arsenic and cadmium, both of which can be nephrotoxic [63].

358 Additionally, at our sample size (n=110), we do not have the power to detect small  
359 differences in effect measure or to generalize to populations outside our study region. Finally,  
360 although survey questions were detailed in nature, the question interpretation by the study  
361 participant may have varied, leading to inaccurate answers. Due to the condensed nature of the  
362 survey timeline, with multiple interviews occurring at one time, investigators could not oversee

363 each individual interview. As such, details pertaining to the number of years when specific  
364 pesticides or water sources were used were sometimes incomplete.

365 This case-control study design was useful for having comparable populations with and  
366 without the disease in order to efficiently evaluate past risk factors associated with disease status.  
367 In the future, a cohort study would be a useful design to evaluate exposure data, exposure timelines,  
368 and incidence rates for CKDu, and we recommend that future studies of CKDu in Sri Lanka be  
369 cohort-based, despite the longer follow-up period and greater expense. In addition, a nationwide,  
370 coordinated CKDu research consortium spanning all major research institutions would make  
371 CKDu research more efficient by standardizing study design and methodologies. This would allow  
372 more accurate conclusions to be drawn from studies with clear and consistent case/control  
373 definitions and study locations.

374 While our survey was comprehensive, our study had several limitations, primarily relating  
375 to case definition, disease progression, and study design characteristics. Temporal bias might have  
376 been introduced since the exact date of CKDu diagnosis was not collected however, the impact of  
377 bias on alcohol consumption is believed to be minimal due to a non-significant difference in the  
378 mean years since first drink ( $t = -1.89$ ) and frequency of alcohol consumption ( $t = -0.49$ ).  
379 Furthermore, there was not a significant difference in the number of years farming among those  
380 reporting a farming occupation (Fisher's exact = 0.07) between cases and control.

381 The appearance and progression of CKDu can involve non-specific symptoms, making the  
382 disease challenging to diagnose in the early, pre-clinical stages limiting the population of cases in  
383 this study to those that were in advanced stages of the disease. Studies suggest using more sensitive  
384 methods for detecting early CKDu, with measurement of microalbuminuria and functional markers  
385 such as Cyst C, creatinine or tubular proteins like RBP4, NGAL or KIM would be beneficial in

386 capturing a greater number of early-stage CKDu cases so that exposures can be better assessed and  
387 treatment initiated earlier [64-66].

388         The lack of association between herbicide and CKDu outcome in the adjusted model  
389 indicates either that herbicide alone is not responsible for CKDu, or that sufficient detail regarding  
390 herbicide use was not captured in the survey. For example, the volume and length of use of  
391 pesticides was difficult to assess in an interview setting compared to a household visit, where  
392 farmers could reference pesticide receipts or other family members for details they could not recall.  
393 More detailed responses regarding usage may have resulted in a difference between cases and  
394 controls, which could not be evaluated in this study.

395         At present, the use of the albumin-creatinine ratio or persistent proteinuria as an initial  
396 screening tool is only sensitive at detecting advanced-stage prevalent CKDu cases. This could  
397 cause misclassification of the disease outcome if the diagnostic test sensitivity is not high enough  
398 to differentiate between early-stage CKDu patients and controls.

399

## 400 **CONCLUSION**

401 In conclusion, this pilot case-control study showed that chewing betel, reporting of in-home pets  
402 and pests, treating drinking water, and age were significantly associated with CKDu. These  
403 cultural and environmental factors are likely part of a multi-factorial etiology that is challenging  
404 to unravel, and that may take years to understand whether preventive measures are effective. Future  
405 studies should be cohort in design and focus on further exploring the identified risk factors and  
406 their epidemiologic relationships to CKDu, as well as possible interventions to attenuate the  
407 incidence of CKDu in Sri Lanka. Potential interventions to be considered based on these findings  
408 might include safe home pest control options, testing and treatment for leptospirosis among

409 community dogs, routine chronic kidney disease screening among those in CKDu endemic areas,  
410 and education focused on hand hygiene in the field. These findings should be considered as  
411 research regarding CKDu in other endemic regions continues.

412

## 413 **DECLARATIONS**

414

### 415 *Ethics approval and consent to participate*

416 The study was approved by the University of California, Davis, Institutional Review  
417 Board (#762486-2). All participants voluntarily provided written consent prior to questionnaire  
418 administration in their preferred language (Sinhala or Tamil).

419

### 420 *Consent for publication*

421 No personal, identifiable information is depicted nor represented.

422

### 423 *Availability of Data and Material*

424 Full questionnaire made available in additional file 1.

425

### 426 *Competing interests*

427 There are no competing nor conflicts of interest to report.

### 428 *Funding*

429 Funding for this research was made possible through a research PASS grant from the  
430 Blum Center for Developing Economies at UC Davis, and a summer research fellowship award  
431 from the University of California Global Health Institute.

432

433 *Author's contributions*

434 All authors listed in this manuscript meet the International Committee of Journal Editors  
435 criteria for authorship.

436

437 *Acknowledgements*

438 Data collection for this study was made possible through the support provided by the  
439 Centre for Research, Education, and Training on Kidney Diseases (CERTkID), namely by the late  
440 Mr. Ranjith Mulleriyia. Twelve graduate students of University of Peradeniya contributed to the  
441 study by interviewing the cases and controls. David Bunn, Ph.D. and Michael Wilkes, M.D.  
442 contributed to the researchers' understanding of the cultural role of alcohol and pesticide use.

#### 443 REFERENCES

- 444 1. Wang H, Naghavi M, Allen C, Barber RM, Bhutta ZA, Carter A, Casey DC, Charlson FJ,  
445 Chen AZ, Coates MM *et al*: **Global, regional, and national life expectancy, all-**  
446 **cause mortality, and cause-specific mortality for 249 causes of death, 1980–**  
447 **2015: a systematic analysis for the Global Burden of Disease Study 2015.** *The*  
448 *Lancet* 2016, **388**(10053):1459-1544.
- 449 2. Athuraliya TN, Abeysekera DT, Amerasinghe PH, Kumarasiri PV, Dissanayake V:  
450 **Prevalence of chronic kidney disease in two tertiary care hospitals: high**  
451 **proportion of cases with uncertain aetiology.** *Ceylon Med J* 2009, **54**(1):23-25.
- 452 3. Jha V, Garcia-Garcia G, Iseki K, Li Z, Naicker S, Plattner B, Saran R, Wang AY, Yang  
453 CW: **Chronic kidney disease: global dimension and perspectives.** *Lancet* 2013,  
454 **382**(9888):260-272.
- 455 4. Lunyera J, Mohottige D, Von Isenburg M, Jeuland M, Patel UD, Stanifer JW: **CKD of**  
456 **Uncertain Etiology: A Systematic Review.** *Clin J Am Soc Nephrol* 2016, **11**(3):379-  
457 385.
- 458 5. Couser WG, Remuzzi G, Mendis S, Tonelli M: **The contribution of chronic kidney**  
459 **disease to the global burden of major noncommunicable diseases.** *Kidney Int*  
460 2011, **80**(12):1258-1270.
- 461 6. Chandrajith R, Nanayakkara S, Itai K, Aturaliya TN, Dissanayake CB, Abeysekera T,  
462 Harada K, Watanabe T, Koizumi A: **Chronic kidney diseases of uncertain etiology**  
463 **(CKDue) in Sri Lanka: geographic distribution and environmental**  
464 **implications.** *Environ Geochem Health* 2011, **33**(3):267-278.

- 465 7. Wanigasuriya K: **Update on uncertain etiology of chronic kidney disease in Sri**  
466 **Lanka's north-central dry zone.** *MEDICC Rev* 2014, **16**(2):61-65.
- 467 8. Elledge MF, Redmon JH, Levine KE, Wickremasinghe RJ, Wanigasuriya KP, Peiris-  
468 John RJ: **Chronic Kidney Disease of Unknown Etiology in Sri Lanka: Quest for**  
469 **Understanding and Global Implications.** *RTI Press* 2014.
- 470 9. Peraza S, Wesseling C, Aragon A, Leiva R, Garcia-Trabanino RA, Torres C, Jakobsson  
471 K, Elinder CG, Hogstedt C: **Decreased kidney function among agricultural**  
472 **workers in El Salvador.** *Am J Kidney Dis* 2012, **59**(4):531-540.
- 473 10. Torres C, Aragon A, Gonzalez M, Lopez I, Jakobsson K, Elinder CG, Lundberg I,  
474 Wesseling C: **Decreased kidney function of unknown cause in Nicaragua: a**  
475 **community-based survey.** *Am J Kidney Dis* 2010, **55**(3):485-496.
- 476 11. Statistics SLDoCa: **Sri Lanka national census data 2012 for each province.** In.  
477 Edited by Statistics Ca; 2012.
- 478 12. Rajapakse S, Shivanthan MC, Selvarajah M: **Chronic kidney disease of unknown**  
479 **etiology in Sri Lanka.** *Int J Occup Environ Health* 2016:1-6.
- 480 13. Lanka DoCaSS: **Census of Population and Housing Sri Lanka 2012.** In.:  
481 Department of Census and Statistics Sri Lanka.
- 482 14. Chaker L, Falla A, van der Lee SJ, Muka T, Imo D, Jaspers L, Colpani V, Mendis S,  
483 Chowdhury R, Bramer WM *et al*: **The global impact of non-communicable**  
484 **diseases on macro-economic productivity: a systematic review.** *European*  
485 *Journal of Epidemiology* 2015, **30**(5):357-395.
- 486 15. Helanterä I, Haapio M, Koskinen P, Gronhagen-Riska C, Finne P: **Employment of**  
487 **patients receiving maintenance dialysis and after kidney transplant: a cross-**  
488 **sectional study from Finland.** *Am J Kidney Dis* 2012, **59**(5):700-706.
- 489 16. Klarenbach S, Stafinski T, Longobardi T, Jacobs P: **The effect of renal insufficiency**  
490 **on workforce participation in the United States: an analysis using National**  
491 **Health and Nutrition Examination Survey III data.** *Am J Kidney Dis* 2002,  
492 **40**(6):1132-1137.
- 493 17. Levine KE, Redmon JH, Elledge MF, Wanigasuriya KP, Smith K, Munoz B, Waduge VA,  
494 Periris-John RJ, Sathikumar N, Harrington JM *et al*: **Quest to identify geochemical**  
495 **risk factors associated with chronic kidney disease of unknown etiology**  
496 **(CKDu) in an endemic region of Sri Lanka-a multimedia laboratory analysis of**  
497 **biological, food, and environmental samples.** *Environ Monit Assess* 2015,  
498 **188**(10):548.
- 499 18. Samsel A, Seneff S: **Glyphosate, pathways to modern diseases II: Celiac sprue**  
500 **and gluten intolerance.** *Interdiscip Toxicol* 2013, **6**(4):159-184.
- 501 19. Wimalawansa SA, Wimalawansa SJ: **Environmentally induced, occupational**  
502 **diseases with emphasis on chronic kidney disease of multifactorial origin**  
503 **affecting tropical countries.** *Ann Occup Environ Med* 2016, **28**:33.
- 504 20. Wimalawansa SJ: **The role of ions, heavy metals, fluoride, and agrochemicals:**  
505 **critical evaluation of potential aetiological factors of chronic kidney disease of**  
506 **multifactorial origin (CKDmfo/CKDu) and recommendations for its**  
507 **eradication.** *Environ Geochem Health* 2016, **38**(3):639-678.
- 508 21. Bandara JMRS, Senevirathna DMAN, Dasanayake DMRSB, Herath V, Bandara JMRS,  
509 Abeysekara T, Rajapaksha KH: **Chronic renal failure among farm families in**  
510 **cascade irrigation systems in Sri Lanka associated with elevated dietary**



- 511 **cadmium levels in rice and freshwater fish (Tilapia).** *Environmental*  
512 *Geochemistry and Health* 2008, **30**(5):465-478.
- 513 22. Bandara JMRS, Wijewardena HVP, Liyanage J, Upul MA, Bandara JMUA: **Chronic**  
514 **renal failure in Sri Lanka caused by elevated dietary cadmium: Trojan horse of**  
515 **the green revolution.** *Toxicology Letters* 2010, **198**(1):33-39.
- 516 23. Jayasumana C, Gunatilake S, Siribaddana S: **Simultaneous exposure to multiple**  
517 **heavy metals and glyphosate may contribute to Sri Lankan agricultural**  
518 **nephropathy.** *BMC Nephrol* 2015, **16**:103.
- 519 24. Wasana HM, Aluthpatabendi D, Kularatne WM, Wijekoon P, Weerasooriya R,  
520 Bandara J: **Drinking water quality and chronic kidney disease of unknown**  
521 **etiology (CKDu): synergic effects of fluoride, cadmium and hardness of water.**  
522 *Environ Geochem Health* 2016, **38**(1):157-168.
- 523 25. Ileperuma OA, Dharmagunawardhane HA, Herath KPRP: **Dissolution of aluminium**  
524 **from sub-standard utensils under high fluoride stress: a possible risk factor**  
525 **for chronic renal failure in the North-Central Province.** *J Natl Sci Found Sri* 2009,  
526 **37**(3):219-222.
- 527 26. Gamage CD, Sarathkumara YD: **Chronic kidney disease of uncertain etiology in**  
528 **Sri Lanka: Are leptospirosis and Hantaviral infection likely causes?** *Med*  
529 *Hypotheses* 2016, **91**:16-19.
- 530 27. Brand RM, Jendrzewski JL, Charron AR: **Potential mechanisms by which a single**  
531 **drink of alcohol can increase transdermal absorption of topically applied**  
532 **chemicals.** *Toxicology* 2007, **235**(3):141-149.
- 533 28. Brand RM, McMahon L, Jendrzewski JL, Charron AR: **Transdermal absorption of**  
534 **the herbicide 2,4-dichlorophenoxyacetic acid is enhanced by both ethanol**  
535 **consumption and sunscreen application.** *Food and Chemical Toxicology* 2007,  
536 **45**(1):93-97.
- 537 29. Peiris-John RJ, Wanigasuriya JK, Wickremasinghe AR, Dissanayake WP, Hittarage A:  
538 **Exposure to acetylcholinesterase-inhibiting pesticides and chronic renal**  
539 **failure.** *Ceylon Med J* 2006, **51**(1):42-43.
- 540 30. Valcke M, Levasseur ME, Soares da Silva A, Wesseling C: **Pesticide exposures and**  
541 **chronic kidney disease of unknown etiology: an epidemiologic review.** *Environ*  
542 *Health* 2017, **16**(1):49.
- 543 31. Wanigasuriya KP, Peiris-John RJ, Wickremasinghe R, Hittarage A: **Chronic renal**  
544 **failure in North Central Province of Sri Lanka: an environmentally induced**  
545 **disease.** *Transactions of the Royal Society of Tropical Medicine and Hygiene* 2007,  
546 **101**(10):1013-1017.
- 547 32. **Epitools Epidemiological Calculators**
- 548 33. Somatunga LC, Ratnayake LR, Wijesinghe WMDNK, Yapa YMMM, Cooray MPNS:  
549 **National alcohol use prevalence survey in Sri Lanka.** *Journal of the Postgraduate*  
550 *Institute of Medicine* 2011:1-12.
- 551 34. Šćiban M, Klačnja M, Antov M, Škrbić B: **Removal of water turbidity by natural**  
552 **coagulants obtained from chestnut and acorn.** *Bioresource Technology* 2009,  
553 **100**(24):6639-6643.
- 554 35. Nanayakkara S, Senevirathna ST, Abeysekera T, Chandrajith R, Ratnatunga N,  
555 Gunarathne ED, Yan J, Hitomi T, Muso E, Komiya T *et al*: **An integrative study of the**  
556 **genetic, social and environmental determinants of chronic kidney disease**



- 557 **characterized by tubulointerstitial damages in the North Central Region of Sri**  
558 **Lanka.** *J Occup Health* 2014, **56**(1):28-38.
- 559 36. Weaver VM, Fadrowski JJ, Jaar BG: **Global dimensions of chronic kidney disease**  
560 **of unknown etiology (CKDu): a modern era environmental and/or**  
561 **occupational nephropathy?** *BMC Nephrol* 2015, **16**:145.
- 562 37. Whiting DR, Guariguata L, Weil C, Shaw J: **IDF diabetes atlas: global estimates of**  
563 **the prevalence of diabetes for 2011 and 2030.** *Diabetes Res Clin Pract* 2011,  
564 **94**(3):311-321.
- 565 38. Neumann J, Ligtenberg G, Klein, II, Koomans HA, Blankestijn PJ: **Sympathetic**  
566 **hyperactivity in chronic kidney disease: pathogenesis, clinical relevance, and**  
567 **treatment.** *Kidney Int* 2004, **65**(5):1568-1576.
- 568 39. Hall JE: **The kidney, hypertension, and obesity.** *Hypertension* 2003, **41**(3 Pt  
569 2):625-633.
- 570 40. Anderson AH, Yang W, Townsend RR, Pan Q, Chertow GM, Kusek JW, Charleston J,  
571 He J, Kallem R, Lash JP *et al*: **Time-updated systolic blood pressure and the**  
572 **progression of chronic kidney disease: a cohort study.** *Ann Intern Med* 2015,  
573 **162**(4):258-265.
- 574 41. Van Vleet TR, Schnellmann RG: **Toxic nephropathy: environmental chemicals.**  
575 *Seminars in Nephrology* 2003, **23**(5):500-508.
- 576 42. Lock EA: **Mechanism of Nephrotoxic Action Due to Organohalogenated**  
577 **Compounds.** *Toxicology Letters* 1989, **46**(1-3):93-106.
- 578 43. Chandrajith R, Dissanayake CB, Ariyaratna T, Herath HM, Padmasiri JP: **Dose-**  
579 **dependent Na and Ca in fluoride-rich drinking water--another major cause of**  
580 **chronic renal failure in tropical arid regions.** *Sci Total Environ* 2011, **409**(4):671-  
581 675.
- 582 44. Jayasumana C, Gunatilake S, Senanayake P: **Glyphosate, hard water and**  
583 **nephrotoxic metals: are they the culprits behind the epidemic of chronic**  
584 **kidney disease of unknown etiology in Sri Lanka?** *Int J Environ Res Public Health*  
585 2014, **11**(2):2125-2147.
- 586 45. Jayasumana C, Paranagama P, Agampodi S, Wijewardane C, Gunatilake S,  
587 Siribaddana S: **Drinking well water and occupational exposure to Herbicides is**  
588 **associated with chronic kidney disease, in Padavi-Sripura, Sri Lanka.** *Environ*  
589 *Health-Glob* 2015, **14**(6).
- 590 46. Jayasekara KB, Dissanayake DM, Sivakanesan R, Ranasinghe A, Karunarathna RH,  
591 Priyantha Kumara GW: **Epidemiology of chronic kidney disease, with special**  
592 **emphasis on chronic kidney disease of uncertain etiology, in the north central**  
593 **region of Sri Lanka.** *J Epidemiol* 2015, **25**(4):275-280.
- 594 47. Rango T, Jeuland M, Manthrithilake H, McCornick P: **Nephrotoxic contaminants in**  
595 **drinking water and urine, and chronic kidney disease in rural Sri Lanka.**  
596 *Science of the Total Environment* 2015, **518-519**:574-585.
- 597 48. Adinolfi M, Corsaro MM, Lanzetta R, Parrilli M, Folkard G, Grant W, Sutherland J:  
598 **Composition of the coagulant polysaccharide fraction from Strychnos**  
599 **potatorum seeds.** *Carbohydr Res* 1994, **263**(1):103-110.
- 600 49. Gitelman H: **Aluminum in Health A Critical Review:** Marcel Dekker; 1989.
- 601 50. Agampodi SB, Dahanayaka NJ, Bandaranayaka AK, Perera M, Priyankara S,  
602 Weerawansa P, Matthias MA, Vinetz JM: **Regional differences of leptospirosis in**

- 603 **Sri Lanka: observations from a flood-associated outbreak in 2011.** *PLoS Negl*  
604 *Trop Dis* 2014, **8**(1):e2626.
- 605 51. Rojas P, Monahan AM, Schuller S, Miller IS, Markey BK, Nally JE: **Detection and**  
606 **quantification of leptospires in urine of dogs: a maintenance host for the**  
607 **zoonotic disease leptospirosis.** *European Journal of Clinical Microbiology &*  
608 *Infectious Diseases* 2010, **29**(10):1305-1309.
- 609 52. Daher EDF, Abreu KLSd, Junior GBdS: **Leptospirosis-associated acute kidney**  
610 **injury.** *Jornal Brasileiro de Nefrologia* 2010, **32**(4):400-407.
- 611 53. Guerra MA: **Leptospirosis: public health perspectives.** *Biologicals* 2013,  
612 **41**(5):295-297.
- 613 54. Musso D, La Scola B: **Laboratory diagnosis of leptospirosis: a challenge.** *J*  
614 *Microbiol Immunol Infect* 2013, **46**(4):245-252.
- 615 55. Picardeau M, Bertherat E, Jancloes M, Skouloudis AN, Durski K, Hartskeerl RA:  
616 **Rapid tests for diagnosis of leptospirosis: current tools and emerging**  
617 **technologies.** *Diagn Microbiol Infect Dis* 2014, **78**(1):1-8.
- 618 56. Gamage CD, Yoshimatsu K, Sarathkumara YD, Kulendiran T, Nanayakkara N,  
619 Arikawa J: **Serological evidence of hantavirus infection in Girandurukotte, an**  
620 **area endemic for chronic kidney disease of unknown aetiology (CKDu) in Sri**  
621 **Lanka.** *Int J Infect Dis* 2017, **57**:77-78.
- 622 57. Vitarana S: **Feasibility of biological control of the low-country live wood**  
623 **termite (*Glyptotermes dilatatus*) of tea (*Camellia sinensis*) in Sri Lanka.** In:  
624 *Proceedings of the regional tea conference Colombo, Sri Lanka: 1988; 1988: 99-112.*
- 625 58. Gupta PC, Ray CS: **Epidemiology of betel quid usage.** *Annals of the Academy of*  
626 *Medicine, Singapore* 2004, **33**(4 Suppl):31-36.
- 627 59. Amarasinghe HK, Usgodaarachchi US, Johnson NW, Laloo R, Warnakulasuriya S:  
628 **Betel-quid chewing with or without tobacco is a major risk factor for oral**  
629 **potentially malignant disorders in Sri Lanka: a case-control study.** *Oral Oncol*  
630 2010, **46**(4):297-301.
- 631 60. Gupta PC, Warnakulasuriya S: **Global epidemiology of areca nut usage.** *Addict Biol*  
632 2002, **7**(1):77-83.
- 633 61. Ariyawardana A, Athukorala AD, Arulanandam A: **Effect of betel chewing, tobacco**  
634 **smoking and alcohol consumption on oral submucous fibrosis: a case-control**  
635 **study in Sri Lanka.** *J Oral Pathol Med* 2006, **35**(4):197-201.
- 636 62. Jacob BJ, Straif K, Thomas G, Ramadas K, Mathew B, Zhang ZF, Sankaranarayanan R,  
637 Hashibe M: **Betel quid without tobacco as a risk factor for oral precancers.** *Oral*  
638 *Oncol* 2004, **40**(7):697-704.
- 639 63. Al-Rmalli SW, Jenkins RO, Haris PI: **Betel quid chewing elevates human exposure**  
640 **to arsenic, cadmium and lead.** *Journal of Hazardous Materials* 2011, **190**(1-3):69-  
641 74.
- 642 64. Lopez-Marin L, Chavez Y, Garcia XA, Flores WM, Garcia YM, Herrera R, Almaguer M,  
643 Orantes CM, Calero D, Bayarre HD *et al*: **Histopathology of chronic kidney disease**  
644 **of unknown etiology in Salvadoran agricultural communities.** *MEDICC Rev*  
645 2014, **16**(2):49-54.
- 646 65. Redmon JH, Elledge MF, Womack DS, Wickremashinghe R, Wanigasuriya KP, Peiris-  
647 John RJ, Lunyera J, Smith K, Raymer JH, Levine KE: **Additional perspectives on**  
648 **chronic kidney disease of unknown aetiology (CKDu) in Sri Lanka--lessons**

649           **learned from the WHO CKDu population prevalence study. *BMC Nephrol* 2014,**  
650           **15:125.**  
651    66.    Ratnayake S, Badurdeen Z, Nanayakkara N, Abeysekara T, Ratnatunga N, Kumarasiri  
652           **R: Screening for chronic kidney disease of uncertain aetiology in Sri Lanka:**  
653           **usability of surrogate biomarkers over dipstick proteinuria. *BMC Nephrol* 2017,**  
654           **18(1):199.**

655  
656  
657    **APPENDIX:**

658    Table S1: Comprehensive Participant Characteristics by Exposure Category

659  
660    **SUPPORTING INFORMATION LEGENDS**

661           *Figure 1:* Map of Sri Lanka by district identifying jurisdiction in which survey  
662    participant was born. Map produced using QGIS v2.18 (Free Software Foundation Inc. Boston,  
663    MA). Jurisdiction boundaries as specified by GADM v2.8, Center for Spatial Statistic,  
664    University of California, Davis, California, USA, accessed November 2015.  
665    <https://gadm.org/data.html>.

666           *Figure 2:* Proportional Venn Diagram produced using Stata IC 14 (Stata Corp., College  
667    Station, TX).

668           Table S1: Characteristics of Population Surveyed: exhaustive list of characteristics  
669    among survey participants by exposure category.

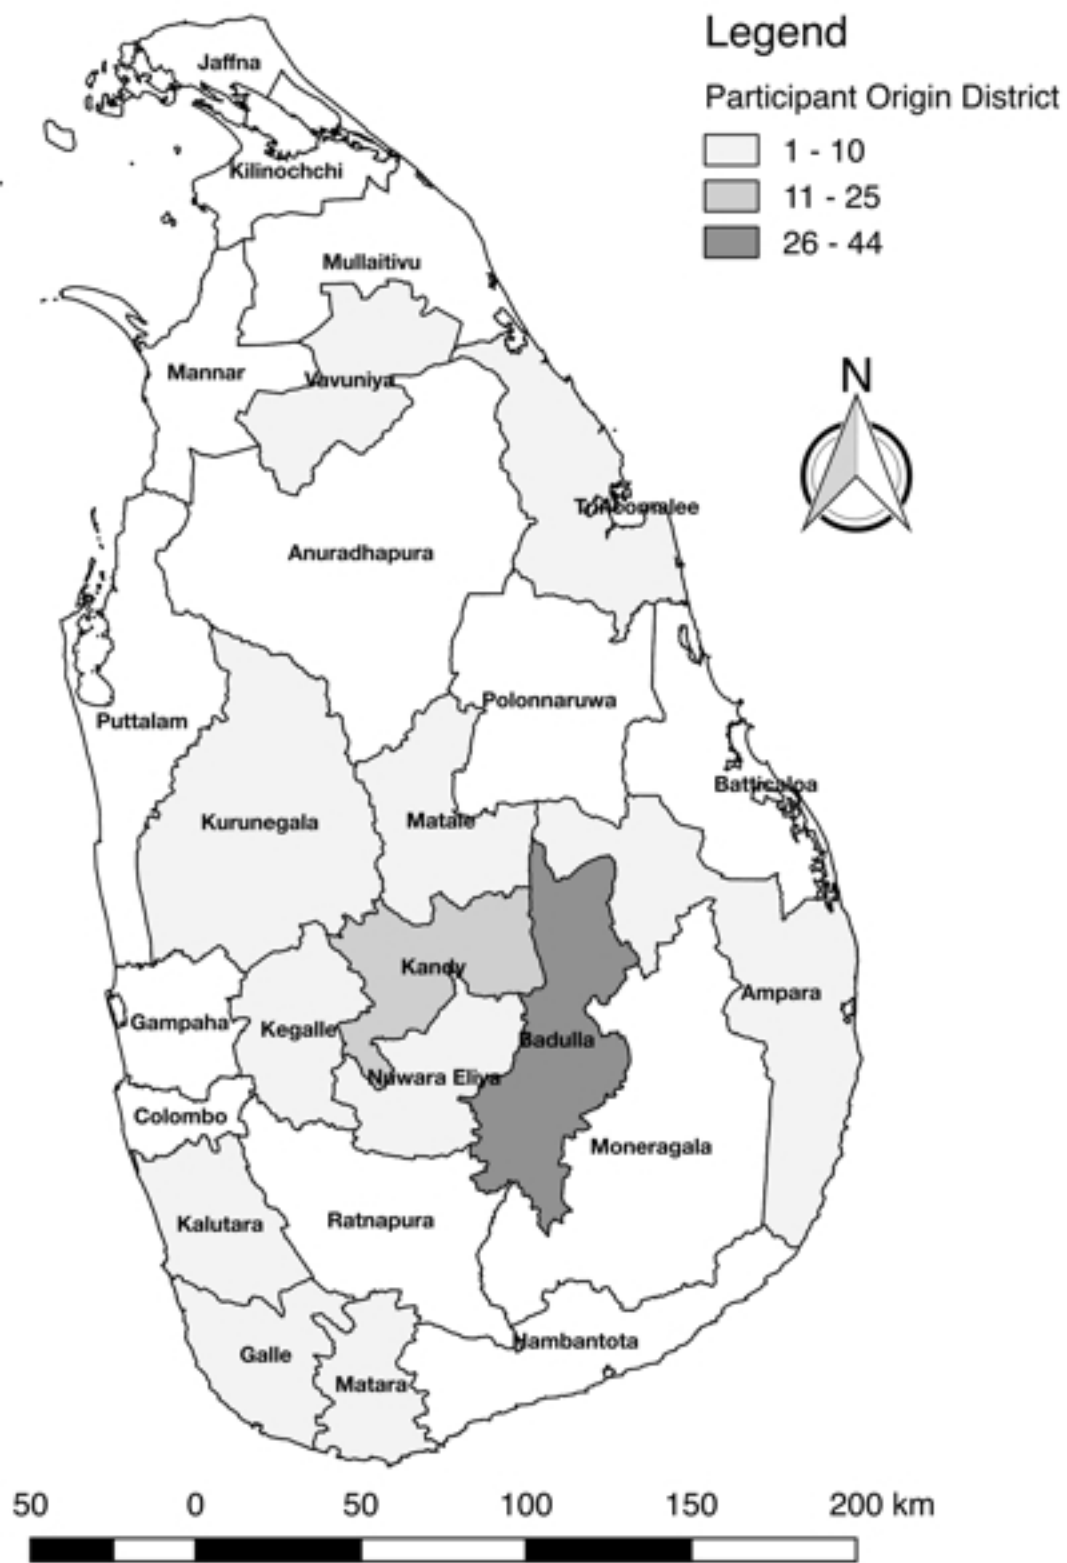

Figure 1

Proportional Venn Diagram by Alcohol Type Among Cases

Proportional Venn Diagram by Alcohol Type Among Controls

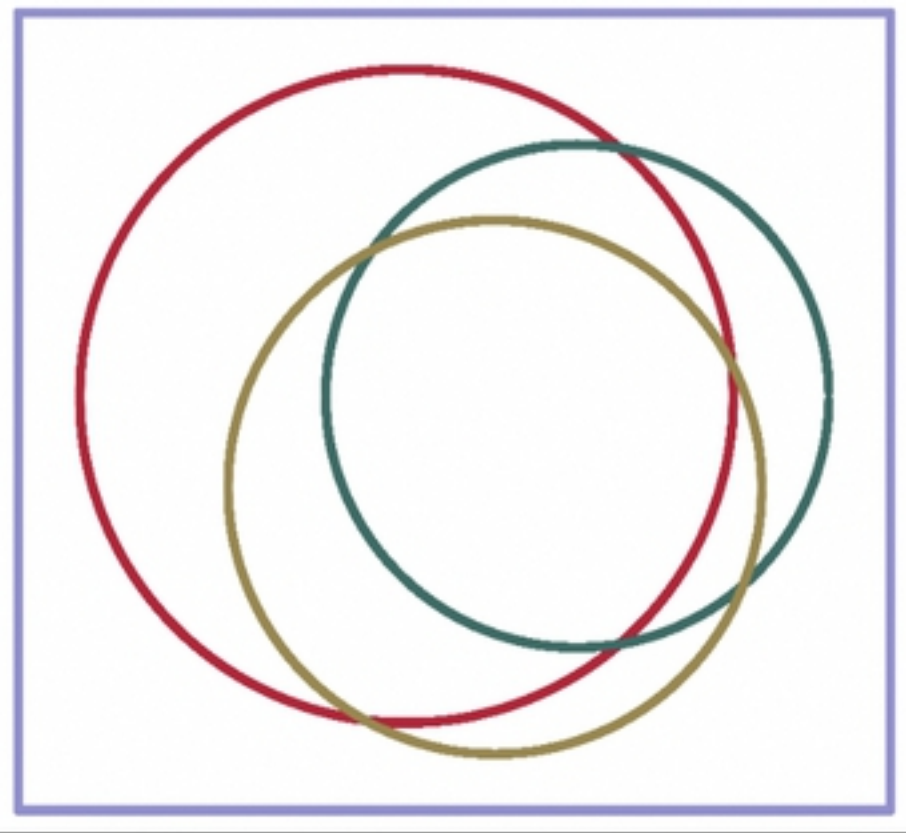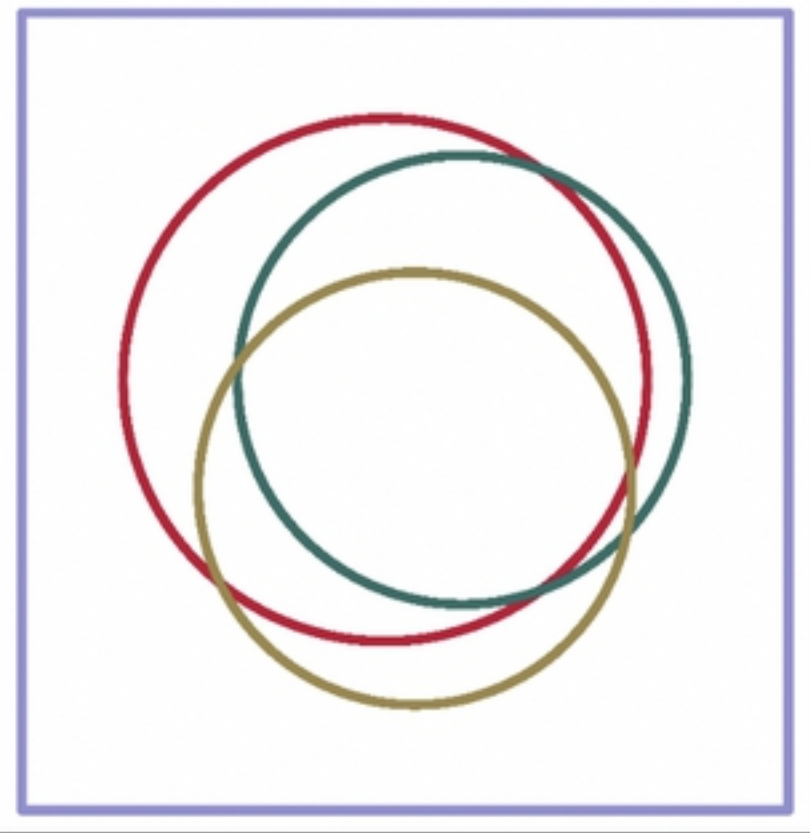

— Arrack — Beer — Kasippu — Total Cases

— Arrack — Beer — Kasippu — Total Controls

Figure2
